# Supplementary material for: Regional default mode network connectivity in major depressive disorder: modulation by acute intravenous citalopram
Source: PubMed Central journal article supplement (PMC6420575; doi:10.1038/s41398-019-0447-0), 2019-03-15

## Supplementary material

### Default mode network array

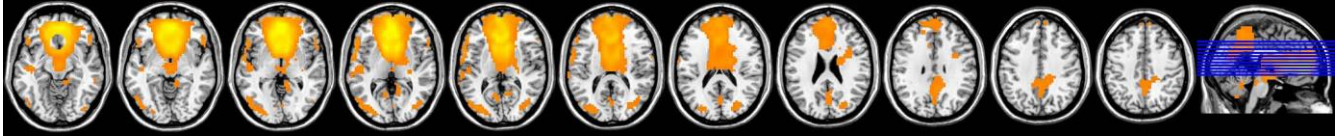

### Default mode anti-correlated network

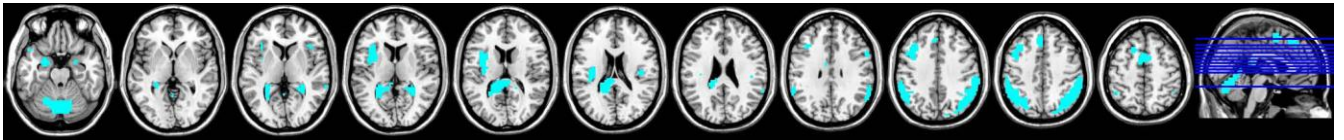

**Figure 1** Independent component arrays from GIFT toolbox

**Table 3 Regions correlated with the DMN**

| <b>Area</b>                | <b>Brodman Area</b> | <b>Volume (cc)</b> | <b>Random effects: Max Value (x, y, z)</b> |
|----------------------------|---------------------|--------------------|--------------------------------------------|
| Anterior Cingulate         | 10, 24, 25, 32      | 5.4/5.2            | 22.1 (-1, 47, -2)/22.4 (2, 44, -2)         |
| Right Cerebrum             |                     | 1.2/1.7            | 9.9 (-1, 61, -3)/21.3 (2, 47, -7)          |
| Extra-Nuclear              |                     | 4.9/5.6            | 20.0 (-4, 28, 8)/18.0 (6, 31, 3)           |
| Caudate                    |                     | 1.9/2.6            | 19.8 (-8, 17, 4)/19.0 (9, 14, 4)           |
| Medial Frontal Gyrus       | 9, 10, 11           | 5.2/4.7            | 19.5 (-4, 51, -3)/19.6 (2, 51, -3)         |
| Sub-Gyral                  |                     | 4.9/5.0            | 18.3 (-8, 31, 8)/16.5 (13, 34, -2)         |
| Lateral Ventricle          |                     | 1.7/1.9            | 17.4 (-4, 14, 4)/17.2 (13, 24, -1)         |
| Superior Frontal Gyrus     | 8, 9, 10, 11        | 4.0/3.0            | 13.7 (-15, 47, -11)/12.5 (20, 43, -15)     |
| Middle Frontal Gyrus       | 6, 10, 11, 47       | 2.0/2.1            | 12.9 (-18, 44, -11)/11.9 (20, 37, -14)     |
| Inferior Frontal Gyrus     | 45, 47              | 2.0/2.0            | 12.4 (-22, 33, -10)/9.0 (23, 30, -10)      |
| Thalamus                   |                     | 0.7/1.2            | 8.0 (-8, -3, 9)/10.3 (6, -3, 9)            |
| Lentiform Nucleus          |                     | 0.8/2.0            | 9.5 (-15, 13, -5)/9.7 (16, 13, -5)         |
| Subcallosal Gyrus          | 13, 34, 47          | 0.3/0.3            | 7.2 (-11, 6, -13)/8.2 (16, 16, -13)        |
| Precuneus                  | 7, 31               | 2.1/2.5            | 5.9 (-1, -45, 48)/6.3 (2, -48, 53)         |
| Precentral Gyrus           | 6, 43, 44           | 0.8/0.2            | 6.3 (-60, 11, 9)/4.5 (41, -17, 61)         |
| Inferior Temporal Gyrus    | 19, 20              | 0.2/0.3            | 6.2 (-50, -71, -1)/3.7 (51, -52, -14)      |
| Middle Occipital Gyrus     | 18, 19, 37          | 2.2/0.6            | 6.2 (-32, -81, 13)/4.2 (34, -71, 17)       |
| Superior Temporal Gyrus    | 22, 41, 42          | 1.6/0.0            | 6.1 (-60, 4, 4)/na (0, 0, 0)               |
| Paracentral Lobule         |                     | 50.5/1.2           | 5.2 (-1, -35, 52)/6.0 (2, -38, 53)         |
| Middle Temporal Gyrus      | 19, 21, 37, 39      | 1.1/0.8            | 5.8 (-36, -77, 18)/4.9 (51, -8, -16)       |
| Cingulate Gyrus            | 23, 31, 32          | 1.0/2.1            | 5.4 (-1, -42, 34)/5.7 (9, -43, 30)         |
| Third Ventricle            |                     | 0.3/0.1            | 5.7 (-1, -7, -8)/4.6 (2, -4, -8)           |
| Cuneus                     |                     | 0.3/0.3            | 5.2 (-25, -84, 13)/4.3 (23, -77, 22)       |
| Cerebellar Tonsil          |                     | 0.6/1.2            | 4.8 (-15, -49, -35)/4.9 (20, -53, -39)     |
| Posterior Cingulate        |                     | 0.4/0.3            | 4.8 (-8, -61, 12)/4.9 (9, -54, 7)          |
| Culmen                     |                     | 0.2/0.6            | 4.5 (-11, -45, -19)/4.8 (9, -44, 2)        |
| Nodule                     |                     | 0.1/0.1            | 4.4 (-8, -56, -27)/4.6 (13, -52, -27)      |
| Fastigium                  |                     | 0.1/0.1            | 4.3 (-8, -49, -19)/4.5 (9, -56, -22)       |
| Inferior Occipital Gyrus   |                     | 0.0/0.1            | -999.0 (0, 0, 0)/4.1 (41, -82, -4)         |
| Inferior Semi-Lunar Lobule |                     | 0.1/0.1            | 4.0 (-4, -63, -35)/3.5 (2, -60, -39)       |
| Lingual Gyrus              |                     | 0.1/0.1            | 3.8 (-22, -88, 4)/4.0 (13, -47, 2)         |
| Postcentral Gyrus          |                     | 0.1/0.0            | 3.8 (-60, -6, 14)/na (0, 0, 0)             |
| Transverse Temporal Gyrus  |                     | 0.1/0.0            | 3.7 (-50, -20, 10)/na(0, 0, 0)             |
| Parahippocampal Gyrus      |                     | 300.0/0.1          | Na (0, 0, 0)/3.5 (13, -38, -2)             |

**Figure 2** Independent components with correlation scores to DMN template

Component 7 spatial correlation = 0.45464

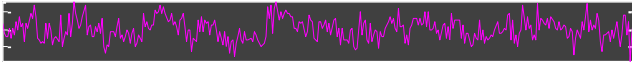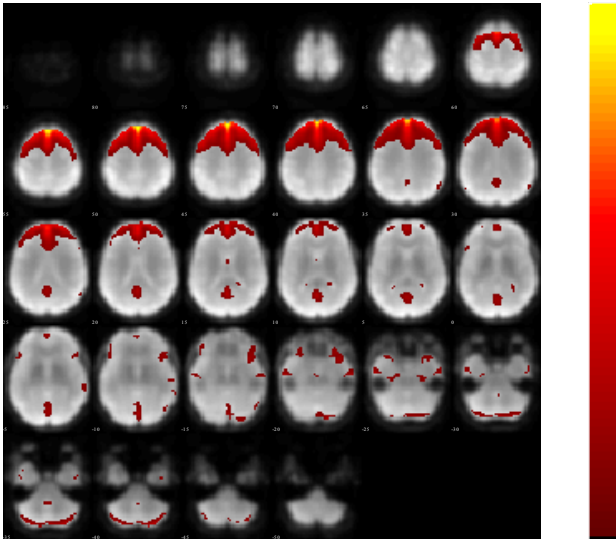

Component 1 spatial correlation = 0.29046

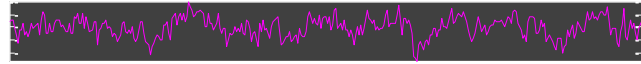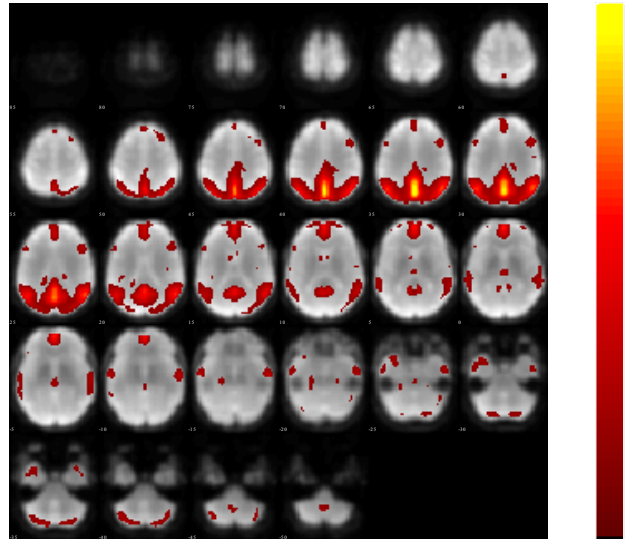

Component 14 spatial correlation = 0.29043

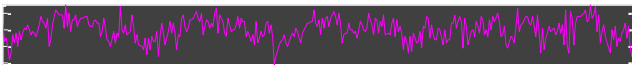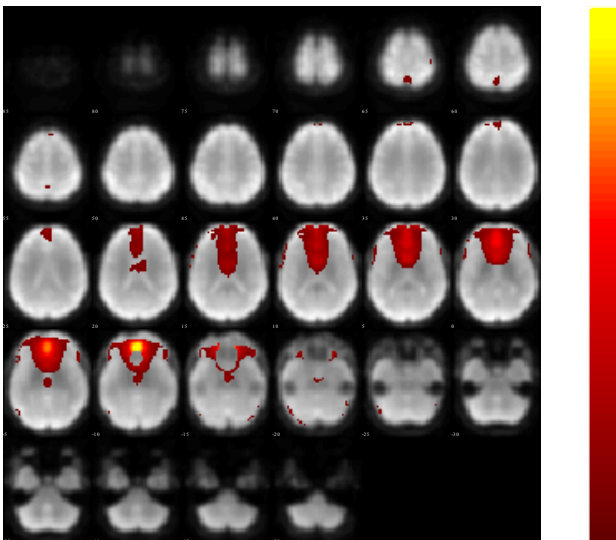

Component 18 spatial correlation = 0.066417

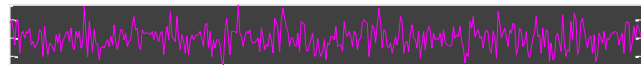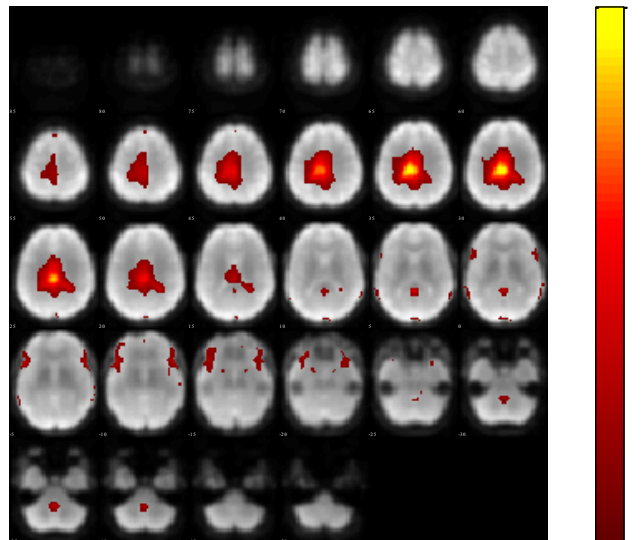

Component 19 spatial correlation = 0.048095

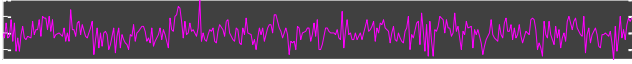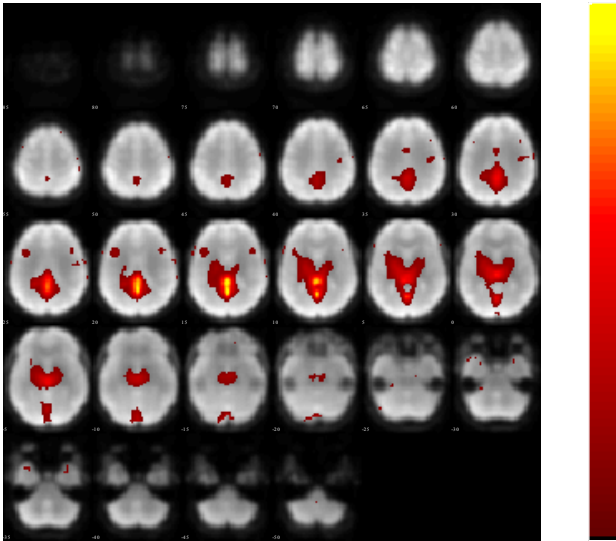

Component 2 spatial correlation = 0.013376

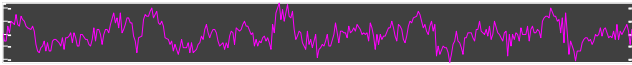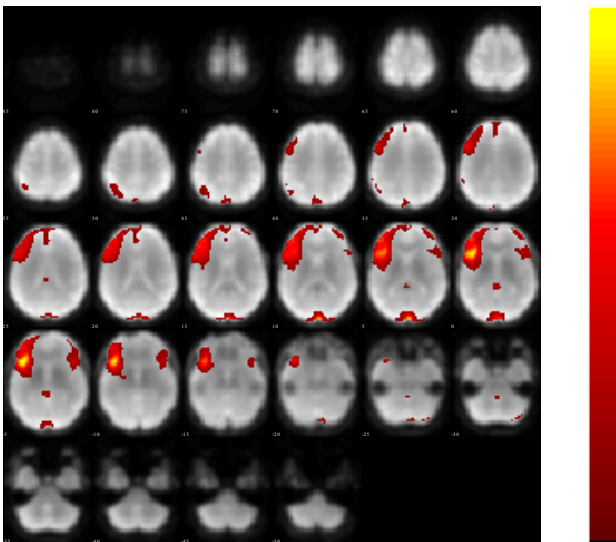

Component 20 spatial correlation = 0.018528

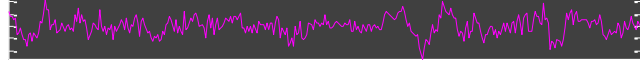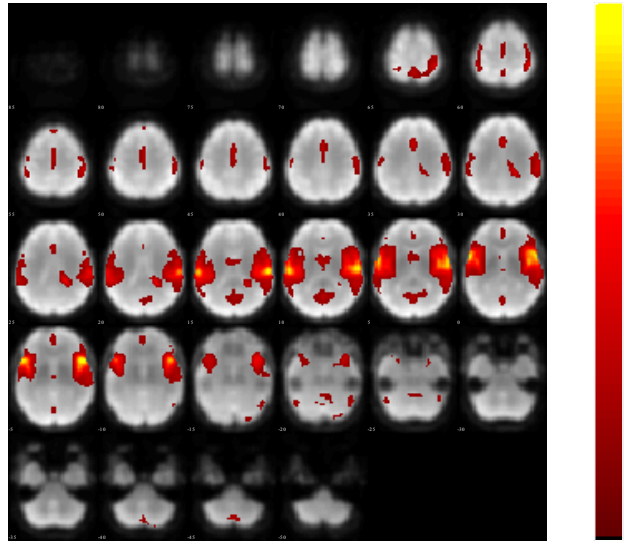

Component 15 spatial correlation = 0.010221

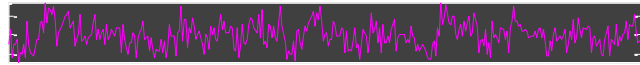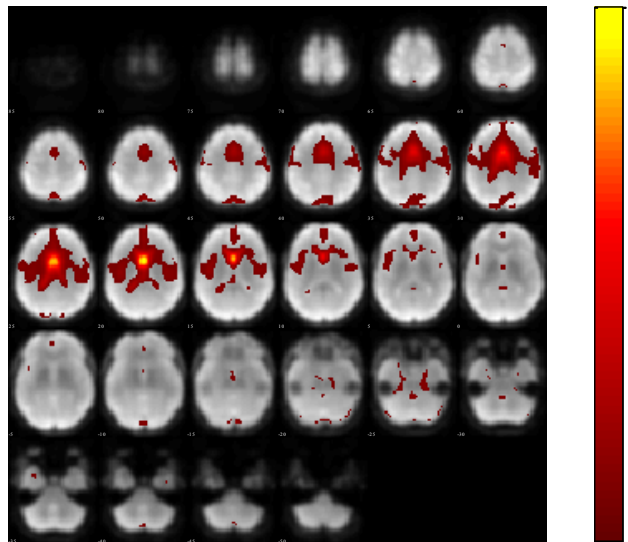

Component 8 spatial correlation = 0.0053508

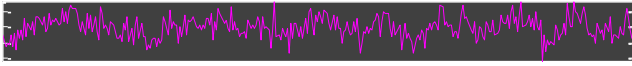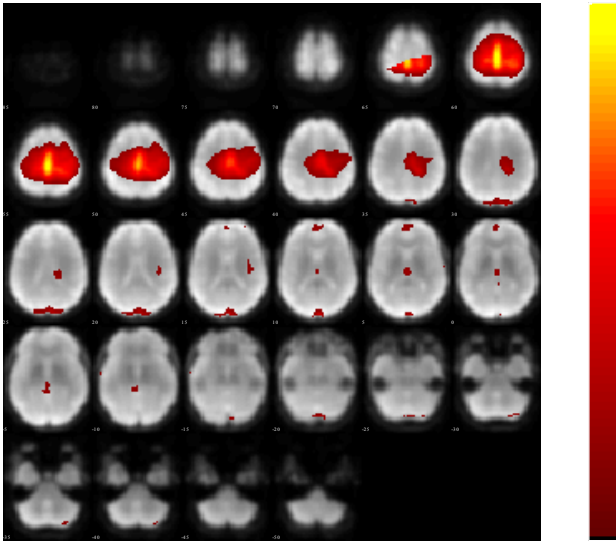

Component 10 spatial correlation = -0.025975

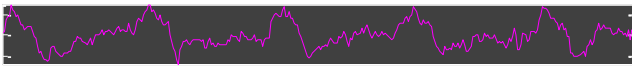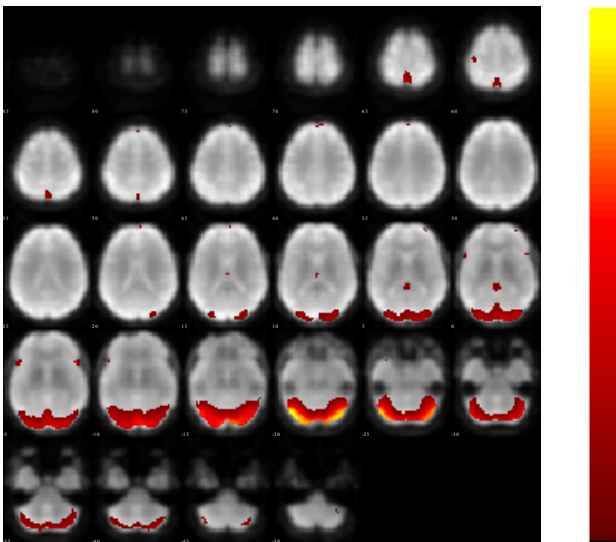

Component 12 spatial correlation = -0.0013597

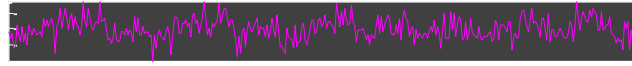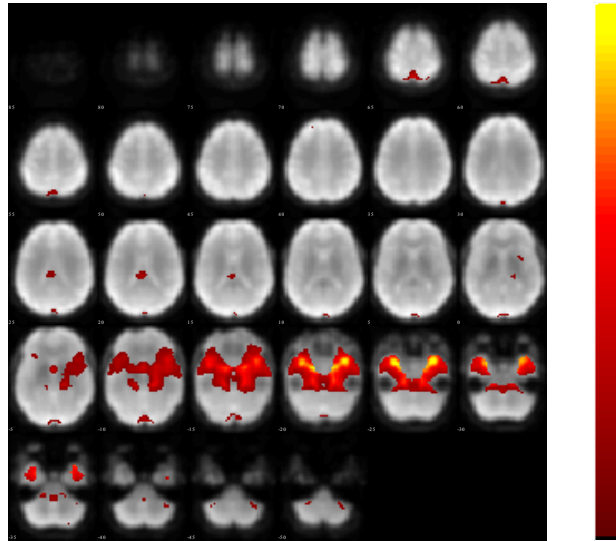

Component 13 spatial correlation = -0.046151

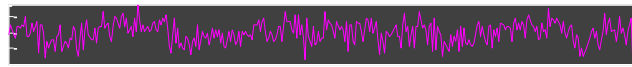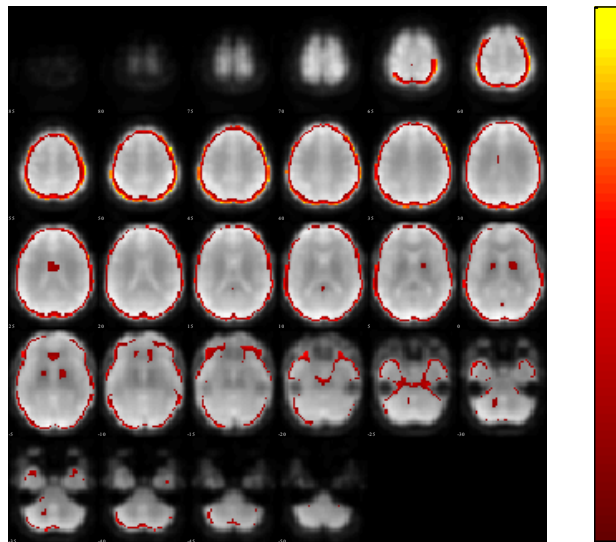

Component 6 spatial correlation = -0.051358

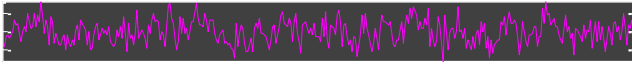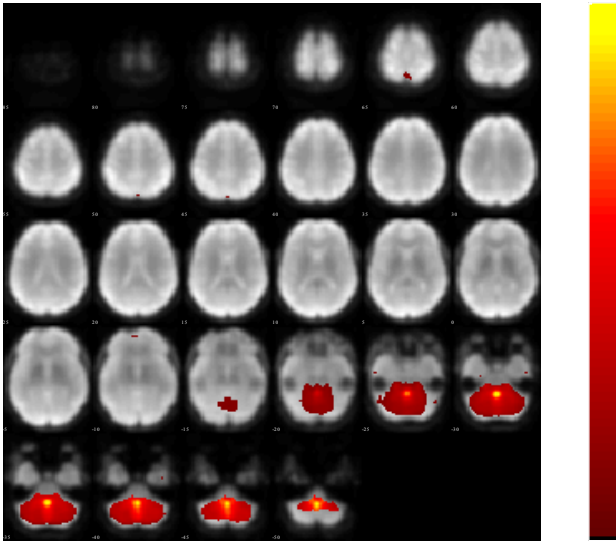

Component 9 spatial correlation = -0.058971

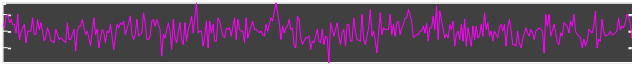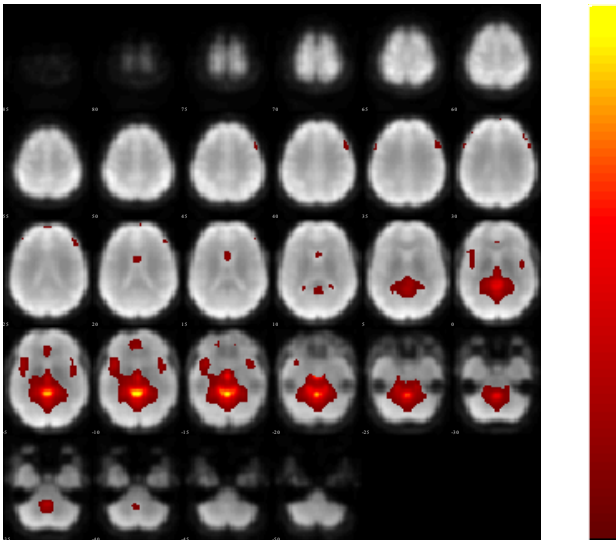

Component 16 spatial correlation = -0.054012

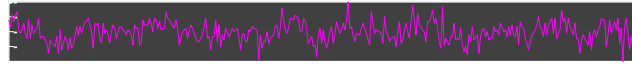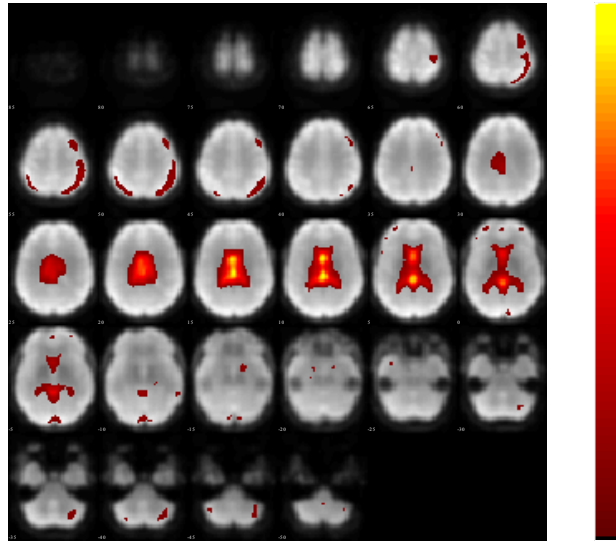

Component 5 spatial correlation = -0.074023

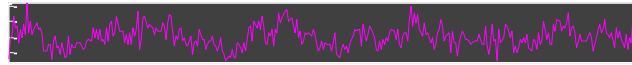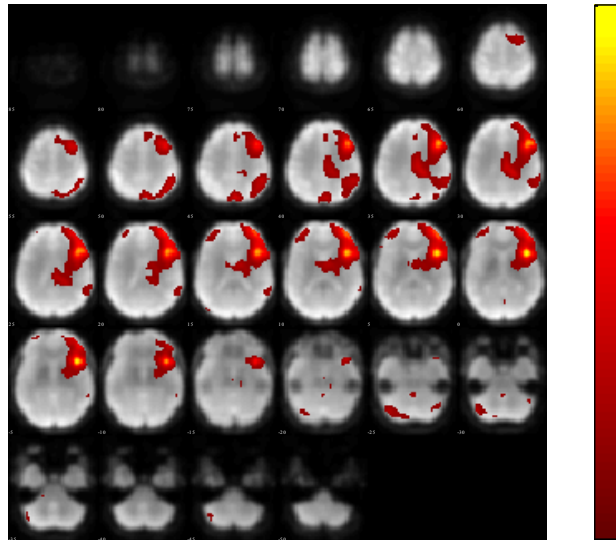

Component 11 spatial correlation = -0.080777

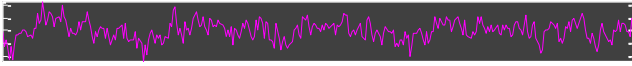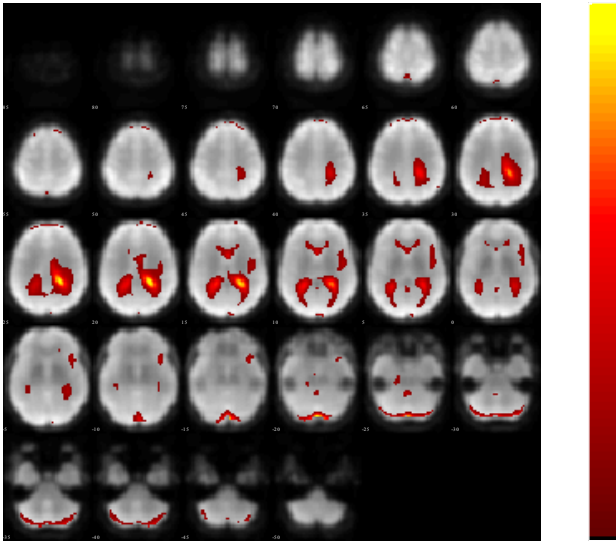

Component 17 spatial correlation = -0.091105

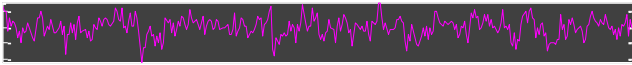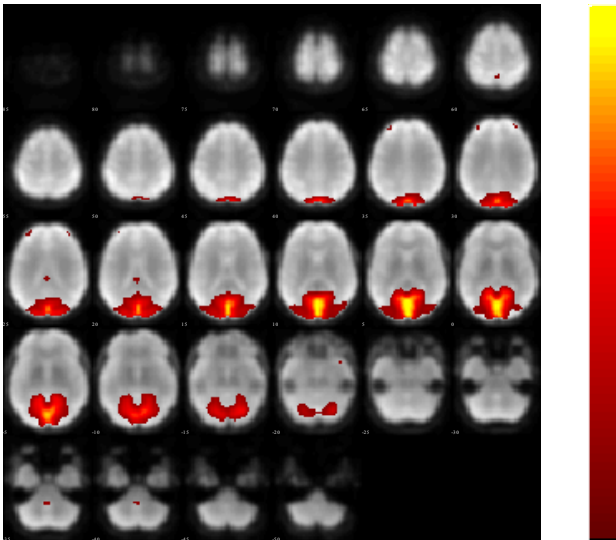

Component 4 spatial correlation = -0.087799

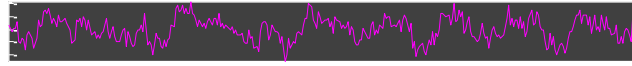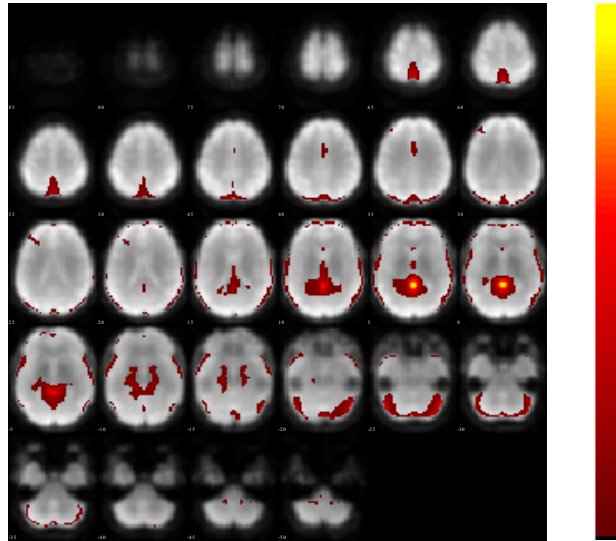

Component 3 spatial correlation = -0.11745

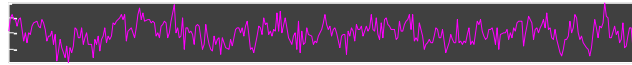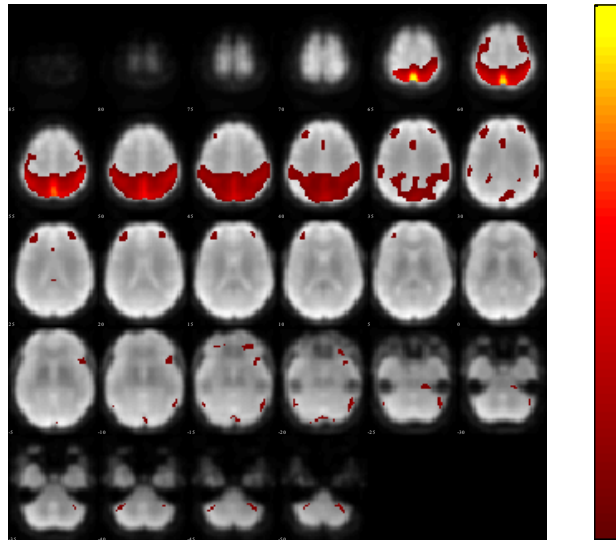

Supplement: 41398_2019_447_MOESM1_ESM.pdf [file 41398_2019_447_MOESM1_ESM.pdf]
