# Supplementary material for: Regional default mode network connectivity in major depressive disorder: modulation by acute intravenous citalopram
Source: PubMed Central journal article supplement (PMC6420575; doi:10.1038/s41398-019-0447-0), 2019-03-15
Supplement: 41398_2019_447_MOESM2_ESM.pdf [file 41398_2019_447_MOESM2_ESM.pdf]

**Supplementary Material**

**Table 1 Post-hoc pairwise comparisons for group by drug interactions (fig 2c,d)**

| <b>Region</b>                                                     | <b>No of voxels</b> | <b>p(FWEc)</b> |
|-------------------------------------------------------------------|---------------------|----------------|
| <b>Small volume correction using interaction mask (precuneus)</b> |                     |                |
| Placebo(HC>MDD)                                                   | 24                  | <b>0.004</b>   |
| HC (placebo>citalopram)                                           | 8                   | <b>0.028</b>   |
| <b>Small volume correction using interaction mask (amygdala)</b>  |                     |                |
| Citalopram (HC>MDD)                                               | 10                  | <b>0.04</b>    |

p(FWE) = family wise error corrected p-value at cluster level

**p values were multiplied by 4 within each mask group to correct for the four post hoc tests completed.**

**Table 2 Mean Frame Displacement (FD) and DVARS**

| <b>Mean FD</b>    |                    |                    |                                                            |
|-------------------|--------------------|--------------------|------------------------------------------------------------|
|                   | <b>HC</b>          | <b>cMDD</b>        |                                                            |
| Citalopram        | 0.217614 (SD 0.08) | 0.437562 (SD 0.26) | P<0.05 effect of group. No significant effect of treatment |
| Placebo           | 0.208711 (SD 0.07) | 0.281471 (SD 0.12) |                                                            |
| <b>Mean DVARS</b> |                    |                    |                                                            |
| Citalopram        | 0.607666 (SD 0.11) | 0.899369 (SD 0.30) | P<0.05 effect of group. No significant effect of treatment |
| Placebo           | 0.621146 (SD 0.08) | 0.703382 (SD 0.20) |                                                            |
